# Supplementary material
Source: PubMed Central journal article supplement (PMC6949123)
Supplement: EMS85000-supplement-Supplementary_Material.pdf [file EMS85000-supplement-Supplementary_Material.pdf]

# Supplementary Material

## Manifestations and mechanisms of the Karakoram glacier Anomaly

Daniel Farinotti<sup>1,2</sup>, Walter W. Immerzeel<sup>3</sup>, Remco de Kok<sup>3</sup>,  
Duncan J. Quincey<sup>4</sup>, Amaury Dehecq<sup>1,2</sup>

<sup>1</sup> Laboratory of Hydraulics, Hydrology and Glaciology (VAW), ETH Zurich, Zurich, Switzerland

<sup>2</sup> Swiss Federal Institute for Forest, Snow and Landscape Research (WSL), Birmensdorf, Switzerland

<sup>3</sup> Department of Physical Geography, Faculty of Geosciences, Utrecht University, Utrecht, The Netherlands

<sup>4</sup> School of Geography, University of Leeds, Leeds, United Kingdom

## 1 S1 Brief history of the idea of a Karakoram Anomaly

2 Early reports on Karakoram glaciers stem from European exploration journeys during the mid-19<sup>th</sup>  
3 and the early 20<sup>th</sup> century [1, 2, 3, 4]. With respect to possible, anomalous behaviour, signs of  
4 rapid, partly cyclic [5] glacier advance were of particular interest. In an overview from the 1930s [6],  
5 this behaviour was attributed to "accidental changes", and was thought to be directly responsible  
6 for the high number of river-floods caused by the outburst of glacier-dammed lakes. Today, some  
7 of these "accidental changes" are recognized to be *glacier surges*. A first inventory of Karakoram  
8 surges was presented in the late 1960s [7].

9 The difference in behaviour of Karakoram glaciers when compared to the rest of High Mountain Asia  
10 or to more intensively studied regions in Europe and North America, was addressed by individual  
11 studies between the late 1970s and early 1990s [8, 9, 10, 11]. It was around the latter decade,  
12 however, that interest in the Karakoram gained momentum [12], with several studies focusing on  
13 surge-type glaciers [13, 14, 15, 16, 17, 18]. By the mid-2000s, enough evidence had accumulated to  
14 prompt Hewitt [19] to propose the existence of a "Karakoram Anomaly": he highlighted how the  
15 central Karakoram *"does emerge as the largest of those very few areas where glaciers are growing*  
16 *today, most probably due to the great elevations, relief, and distinctive climatic regimes involved"*.  
17 The latter interpretation rested upon reports analysing regional climatic trends [20], which seemed  
18 to indicate the possibility that the glaciers of the region were gaining mass.

19 The idea of the Karakoram having a positive glacier mass budget was intriguing, but was also  
20 met with scepticism [21, 22]. For one, it was in stark contrast to the widespread glacier mass  
21 loss observed for the Himalaya [23] and other nearby regions [24]; for another, it was in contra-  
22 diction with the only glaciological mass balance measurements available for the region [25]. The  
23 quest gained additional attention after the publication of the Intergovernmental Panel on Climate  
24 Change's Fourth Assessment Report in 2007 [26]. The report, in fact, included the unfortunate  
25 and erroneous [27, 28] claim that *"the likelihood of [glaciers in the Himalayas] disappearing by the*  
26 *year 2035 and perhaps sooner is very high"*. This sparked a suite of new studies, often fostered by  
27 the advances in remote sensing capabilities [29, 30], which confirmed the Karakoram being a region  
28 with slightly positive glacier balances [31] resulting in glacier expansion [32] and thickening [33].  
29 In the same wake, also the region's many surge-type glaciers gained attention [34, 35, 36, 37, 38],  
30 with indications for a noticeable increase in surging activity after the year 1990 [39].

31 The most recent studies [40, 41, 42, 43] largely confirm that, albeit small in magnitude, a slight  
32 glacier mass gain has occurred in the Karakoram during the past two decades. Compared to  
33 worldwide glacier changes, this seems the strongest argument for a "Karakoram Anomaly" at  
34 present.

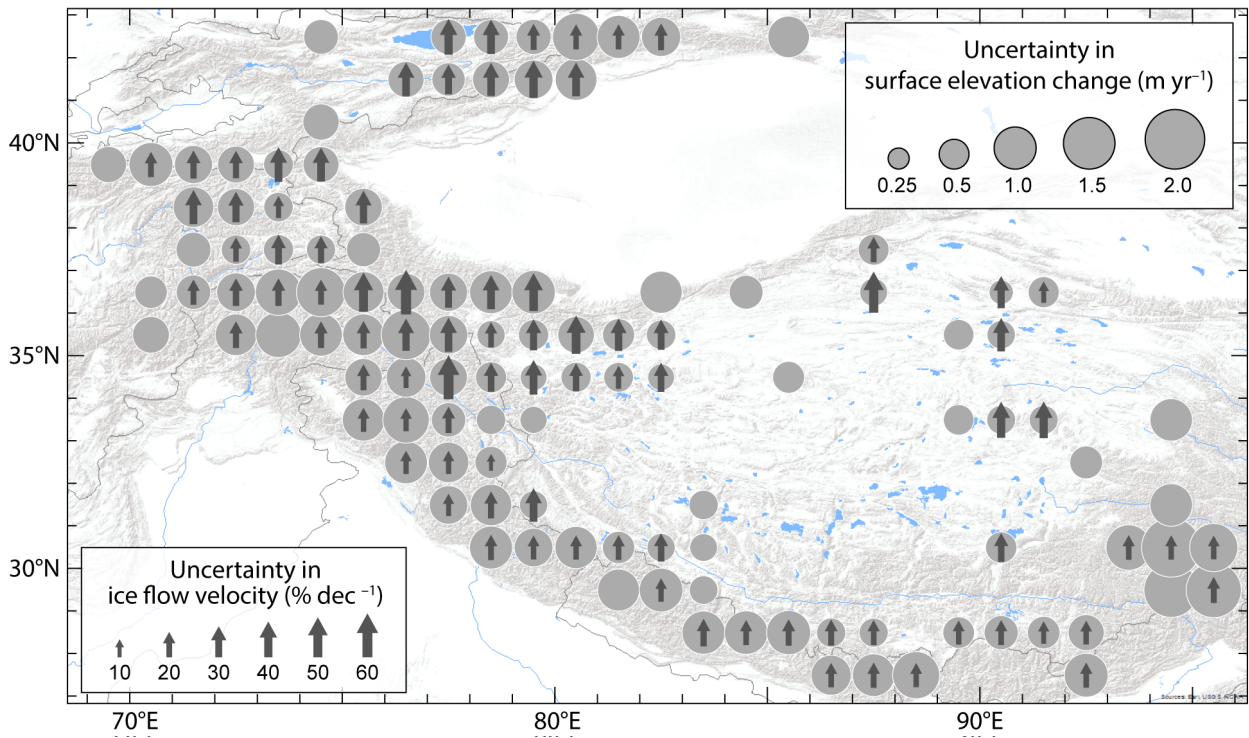

Figure S1: **Uncertainties in trends of glacier surface elevation changes and ice-flow velocities.** Circles show the  $2\sigma$ -uncertainty of the glacier surface elevation change rates by Brun et al. [44] (colors of the circles in Fig. 2 of the main article), and arrows show the  $2\sigma$ -uncertainty of the ice flow velocity trends by Dehecq et al. [45] (arrows in Fig. 2 of the main article). Basemap source: Esri, USGS, NOAA.

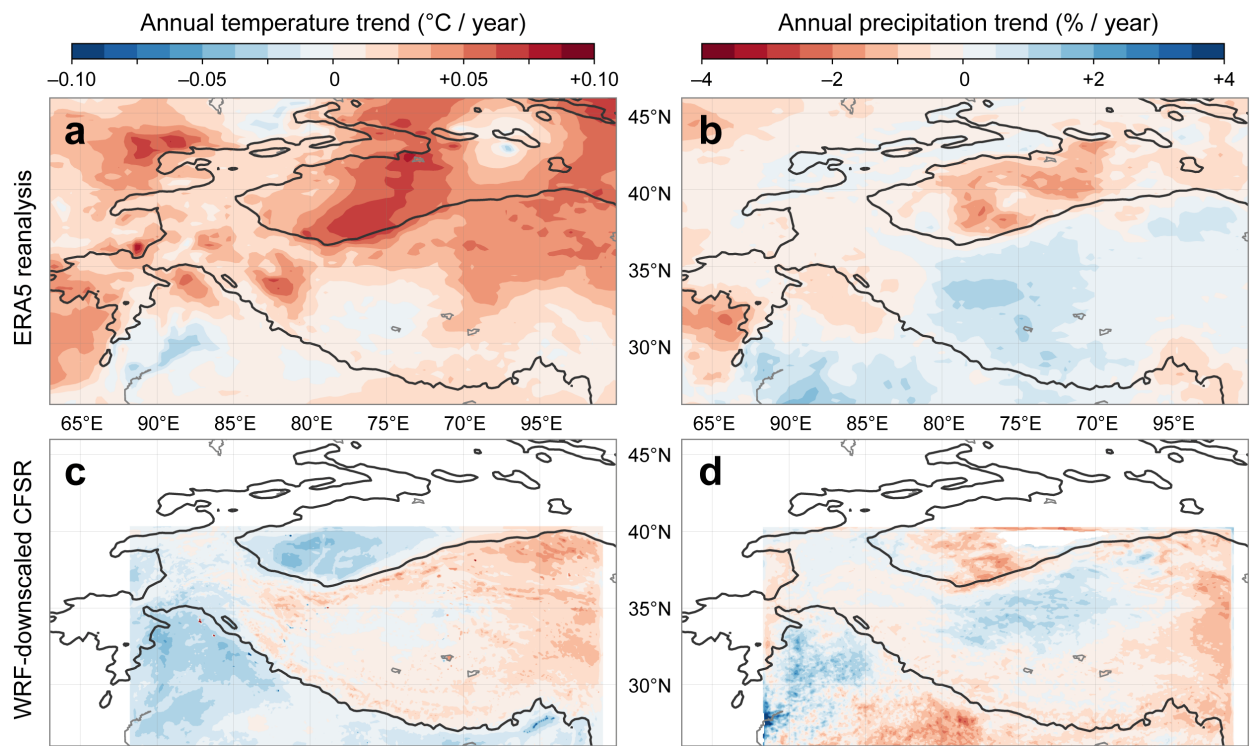

Figure S2: **Comparison of climatic trends from different datasets.** 1979-2014 trends in April-to-March temperatures (left column, **a**, **c**) and precipitation (right column, **b**, **d**) are compared for two dataset. The top row (**a**, **b**) refers to the ERA5 climate reanalysis [46]; the bottom row (**c**, **d**) to the Climate Forecast System Reanalysis (CFSR) downscaled by using the Weather Research and Forecasting (WRF) model (Norris et al. [47]). Spatial resolution is 31 km for ERA5 and 6 km for the WRF-downscaled CFSR. Note that the WRF-downscaled CFSR dataset does not cover the whole domain (white areas). A 2,000 m contour line (black) is provided for orientation.

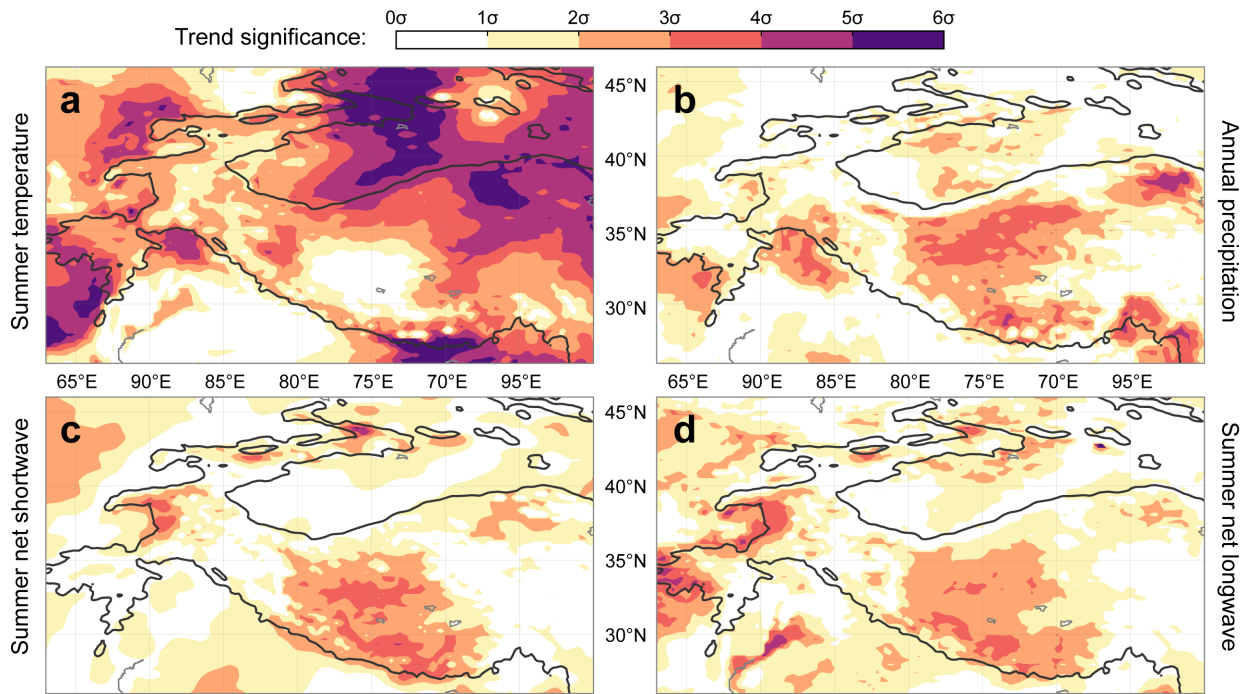

Figure S3: **Significance of climatic trends.** Panels show the significance of 1980-2018 trends in (a) summer (JJA) temperature, (b) annual precipitation, (c) summer net shortwave radiation, and (d) summer net longwave radiation (cf. Fig. 3 in the main article). Significance levels are expressed in units of standard deviations ( $\sigma$ ) from the mean, and are obtained from two-sided p-values of a Wald test. The Wald test was performed using the Python package *SciPy* [48]. A 2,000 m contour line (black) is provided for orientation.

## Supplementary References

- [1] Schlagintweit, H., Schlagintweit, A. & Schlagintweit, R. *Results of a scientific mission to India and High Asia undertaken between the years 1854 and 1858* (Trubner, London, UK, 1861). 4 volumes.
- [2] Godwin-Austen, H. H. The glaciers of the Muztagh Range. *Proceedings of the Royal Geographic Society* **34**, 19–56 (1864).
- [3] Shaw, R. *Visits to High Tartary, Yârkand, and Kâshghar: Formerly Chinese Tartary* (John Murray, London, UK, 1871).
- [4] Hayden, H. H. Notes on certain glaciers in Northwest Kashmir. *Records of the Geological Survey of India* **35**, 127–137 (1907).
- [5] Longstaff, T. G. Glacier exploration in the Eastern Karakoram. *The Geographical Journal* **35**, 622–653 (1910). doi:<http://doi.org/10.2307/1777235>.
- [6] Mason, K. *The glaciers of the Karakoram and neighbourhood* (Geological Survey of India, 1930).
- [7] Hewitt, K. Glacier surges in the Karakoram Himalaya (Central Asia). *Canadian Journal of Earth Sciences* **6**, 1009–1018 (1969). doi:<http://doi.org/10.1139/e69-106>.
- [8] Mayewski, P. A. & Jeschke, P. A. Himalayan and Trans-Himalayan glacier fluctuations since AD 1812. *Arctic and Alpine Research* **11**, 267–287 (1979). doi:<http://doi.org/10.1080/00040851.1979.12004137>.
- [9] Batura Glacier Investigation Group. The Batura Glacier in the Karakoram mountains and its variations. *Scientia Sinica* **22**, 958–974 (1979). doi:<http://doi.org/10.1360/ya1979-22-8-958>.
- [10] Kick, W. The decline of the last Little Ice Age in High Asia compared with that in the Alps. In Oerlemans, J. (ed.) *Glacier fluctuations and climate change*, 129–142 (Kluwer, Dordrecht, The Netherlands, 1989). doi:[http://doi.org/10.1007/978-94-015-7823-3\\_8](http://doi.org/10.1007/978-94-015-7823-3_8).
- [11] Shroder, J. F., Owen, L. & Derbyshire, E. Quaternary glaciation of the Karakoram mountains and Nanga Parbat Himalaya. In Shroder, J. F. J. (ed.) *Himalaya to the Sea: Geology, Geomorphology and the Quaternary*, 159–183 (Routledge, London, UK, 1993). doi:<http://doi.org/10.4324/9780203414637>.
- [12] Hewitt, K. Glaciers receive a surge of attention in the Karakoram Himalaya. *EOS: Transactions of the American Geophysical Union* **79**, 104–105 (1998). doi:<http://doi.org/10.1029/98E000071>.
- [13] Young, G. & Schmok, J. Ice loss in the ablation area of a Himalayan glacier; studies on Miâr Glacier, Karakoram Mountains, Pakistan. *Annals of Glaciology* **13**, 289–293 (1989). doi:<http://doi.org/10.3189/S0260305500008077>.
- [14] Hewitt, K., Wake, C. P., Young, G. J. & David, C. Hydrological investigations at Biafo Glacier, Karakoram Range, Himalaya; an important source of water for the Indus River. *Annals of Glaciology* **13**, 103–108 (1989). doi:<http://doi.org/10.3189/S0260305500007710>.

- 73 [15] Gardner, J. S. & Hewitt, K. A surge of Bualtar Glacier, Karakoram Range, Pakistan: A  
74 possible landslide trigger. *Journal of Glaciology* **36**, 159–162 (1990). doi:[http://doi.org/  
75 10.3189/S0022143000009394](http://doi.org/10.3189/S0022143000009394).
- 76 [16] Wake, C. P. & Searle, M. P. Rapid advance of Pumarikish Glacier, Hispar Glacier Basin,  
77 Karakoram Himalaya. *Journal of Glaciology* **39**, 204–206 (1993). doi:[http://doi.org/10.  
78 3189/S0022143000015847](http://doi.org/10.3189/S0022143000015847).
- 79 [17] Kotliakov, V. M. (ed.) *World atlas of snow and ice resources* (Russian Academy of Sciences,  
80 Institute of Geography, Moscow, Russia, 1997).
- 81 [18] Diolaiuti, G., Pecci, M. & Smiraglia, C. Liligo Glacier, Karakoram, Pakistan: a reconstruc-  
82 tion of the recent history of a surge-type glacier. *Annals of Glaciology* **36**, 168–172 (2003).  
83 doi:<http://doi.org/10.3189/172756403781816103>.
- 84 [19] Hewitt, K. The Karakoram Anomaly? Glacier Expansion and the 'Elevation Effect',  
85 Karakoram Himalaya. *Mountain Research and Development* **25**, 332–340 (2005). doi:[http://doi.org/10.1659/0276-4741\(2005\)025\[0332:TKAGEA\]2.0.CO;2](http://doi.org/10.1659/0276-4741(2005)025[0332:TKAGEA]2.0.CO;2).
- 87 [20] Archer, D. R. & Fowler, H. J. Spatial and temporal variations in precipitation in the Upper  
88 Indus Basin, global teleconnections and hydrological implications. *Hydrology and Earth System  
89 Sciences* **8**, 47–61 (2004). doi:<http://doi.org/10.5194/hess-8-47-2004>.
- 90 [21] Immerzeel, W. W., Droogers, P., De Jong, S. M. & Bierkens, M. F. P. Large-scale monitoring  
91 of snow cover and runoff simulation in Himalayan river basins using remote sensing. *Remote  
92 sensing of Environment* **113**, 40–49 (2009). doi:[http://doi.org/10.1016/j.rse.2008.08.  
93 010](http://doi.org/10.1016/j.rse.2008.08.010).
- 94 [22] Cogley, J. Present and future states of Himalaya and Karakoram glaciers. *Annals of Glaciology*  
95 **52**, 69–73 (2011). doi:<http://doi.org/10.3189/172756411799096277>.
- 96 [23] Kargel, J. S. *et al.* Multispectral imaging contributions to global land ice measurements from  
97 space. *Remote Sensing of Environment* **99**, 187–219 (2005). doi:[http://doi.org/10.1016/  
98 j.rse.2005.07.004](http://doi.org/10.1016/j.rse.2005.07.004).
- 99 [24] Liu, S. *et al.* Glacier retreat as a result of climate warming and increased precipitation in  
100 the Tarim river basin, northwest China. *Annals of Glaciology* **43**, 91–96 (2006). doi:<http://doi.org/10.3189/172756406781812168>.
- 102 [25] Bhutiyani, M. R. Mass-balance studies on Siachen glacier in the Nubra valley, Karakoram  
103 Himalaya, India. *Journal of Glaciology* **45**, 112–118 (1999). doi:[http://doi.org/10.1017/  
104 S0022143000003099](http://doi.org/10.1017/S0022143000003099).
- 105 [26] Cruz, R. V. *et al.* Aisa. In Parry, M. L., Canziani, O. F., Palutikof, J. P., van der Linden,  
106 P. J. & Hanson, C. E. (eds.) *Climate Change 2007: Impacts, adaptation and vulnerability. Contribution of Working Group II to the Fourth Assessment Report of the Intergovernmental Panel on Climate Change*, 469–506 (Cambridge University Press, Cambridge, UK, 2007).
- 109 [27] Raina, V. K. Himalayan Glaciers – A State-of-art review of glacial studies, glacial retreat and  
110 climate change. MoEF discussion paper, Ministry of Environment and Forests, Government  
111 of India, New Delhi, India (2009).

- 112 [28] Cogley, J. G., Kargel, J. S., Kaser, G. & van der Veen, C. J. Tracking the source of glacier  
113 misinformation. *Science* **327**, 522 (2010). doi:[http://doi.org/10.1126/science.327.5965.](http://doi.org/10.1126/science.327.5965.522-a)  
114 [522-a](http://doi.org/10.1126/science.327.5965.522-a).
- 115 [29] Kääb, A. Combination of SRTM3 and repeat ASTER data for deriving alpine glacier flow  
116 velocities in the Bhutan Himalaya. *Remote Sensing of Environment* **94**, 463–474 (2005).  
117 doi:<http://doi.org/10.1016/j.rse.2004.11.003>.
- 118 [30] Luckman, A., Quincey, D. J. & Bevan, S. The potential of satellite radar interferometry  
119 and feature tracking for monitoring flow rates of Himalayan glaciers. *Remote Sensing of*  
120 *Environment* **111**, 172–181 (2007). doi:[http://doi.org/https://doi.org/10.1016/j.rse.](http://doi.org/https://doi.org/10.1016/j.rse.2007.05.019)  
121 [2007.05.019](http://doi.org/https://doi.org/10.1016/j.rse.2007.05.019).
- 122 [31] Gardelle, J., Berthier, E. & Arnaud, Y. Slight mass gain of Karakoram glaciers in the early  
123 twenty-first century. *Nature Geoscience* **5**, 322–325 (2012). doi:[http://doi.org/10.1038/](http://doi.org/10.1038/ngeo1450)  
124 [ngeo1450](http://doi.org/10.1038/ngeo1450).
- 125 [32] Scherler, D., Bookhagen, B. & Strecker, M. R. Spatially variable response of Himalayan  
126 glaciers to climate change affected by debris cover. *Nature Geoscience* **4**, 156–159 (2011).  
127 doi:<http://doi.org/10.1038/ngeo1068>.
- 128 [33] Kääb, A., Berthier, E., Nuth, C., Gardelle, J. & Arnaud, Y. Contrasting patterns of early  
129 twenty-first-century glacier mass change in the Himalayas. *Nature* **488**, 495–498 (2012).  
130 doi:<http://doi.org/10.1038/nature11324>.
- 131 [34] Copland, L. *et al.* Glacier velocities across the central karakoram. *Annals of Glaciology* **50**,  
132 41–49 (2009). doi:<http://doi.org/10.3189/172756409789624229>.
- 133 [35] Quincey, D. J. *et al.* Ice velocity and climate variations for Baltoro Glacier, Pakistan. *Journal*  
134 *of Glaciology* **55**, 1061–1071 (2009). doi:<http://doi.org/10.3189/002214309790794913>.
- 135 [36] Quincey, D. J. *et al.* Karakoram glacier surge dynamic. *Geophysical Research Letters* **38**,  
136 L18504 (2011). doi:<http://doi.org/10.1029/2011GL049004>.
- 137 [37] Mayer, C., Fowler, A. C., Lambrecht, A. & Scharrer, K. A surge of North Gasherbrum Glacier,  
138 Karakoram, China. *Journal of Glaciology* **57**, 904–916 (2011). doi:[http://doi.org/10.3189/](http://doi.org/10.3189/002214311798043834)  
139 [002214311798043834](http://doi.org/10.3189/002214311798043834).
- 140 [38] Ding, M. *et al.* Surge-type glaciers in Karakoram Mountain and possible catastrophes alongside  
141 a portion of the Karakoram Highway. *Natural Hazards* **90**, 1017–1020 (2018). doi:<http://doi.org/10.1007/s11069-017-3063-4>.  
142 [//doi.org/10.1007/s11069-017-3063-4](http://doi.org/10.1007/s11069-017-3063-4).
- 143 [39] Copland, L. *et al.* Expanded and recently increased glacier surging in the Karakoram. *Arctic,*  
144 *Antarctic, and Alpine Research* **43**, 503–516 (2011). doi:[http://doi.org/10.1657/](http://doi.org/10.1657/1938-4246-43.4.503)  
145 [1938-4246-43.4.503](http://doi.org/10.1657/1938-4246-43.4.503).
- 146 [40] Kääb, A., Treichler, D., Nuth, C. & Berthier, E. Brief Communication: Contending estimates  
147 of 2003–2008 glacier mass balance over the Pamir-Karakoram-Himalaya. *The Cryosphere* **9**,  
148 557–564 (2015). doi:<http://doi.org/10.5194/tc-9-557-2015>.
- 149 [41] Brun, F., Berthier, E., Wagnon, P., Kääb, A. & Treichler, D. A spatially resolved estimate of  
150 High Mountain Asia glacier mass balances from 2000 to 2016. *Nature Geoscience* **10**, 668–673  
151 (2017). doi:<http://doi.org/10.1038/ngeo2999L3>.



- 152 [42] Zemp, M. *et al.* Global glacier mass balances and their contributions to sea-level rise from 1961  
153 to 2016. *Nature* **568**, 382–386 (2019). doi:<http://doi.org/10.1038/s41586-019-1071-0>.
- 154 [43] Berthier, E. & Brun, F. Karakoram glacier mass balances between 2008 and 2016: persistence  
155 of the anomaly and influence of a large rock avalanche on Siachen Glacier. *Journal of Glaciology*  
156 **65**, 494–507 (2019). doi:<http://doi.org/10.1017/jog.2019.32>.
- 157 [44] Brun, F. *et al.* Heterogeneous Influence of Glacier Morphology on the Mass Balance Variability  
158 in High Mountain Asia. *Journal of Geophysical Research: Earth Surface* **124** (2019). doi:<http://doi.org/10.1029/2018JF004838>.
- 160 [45] Dehecq, A. *et al.* Twenty-first century glacier slowdown driven by mass loss in High  
161 Mountain Asia. *Nature Geoscience* **12**, 22–27 (2019). doi:<http://doi.org/10.1038/s41561-018-0271-9>.
- 163 [46] Copernicus Climate Change Service. ERA5: Fifth generation of ECMWF atmospheric reanal-  
164 yses of the global climate. Available at: <https://cds.climate.copernicus.eu/cdsapp#!/home>  
165 [Online resource, last accessed July 2019] (2017).
- 166 [47] Norris, J., Carvalho, L. M. V., Jones, C. & Cannon, F. Deciphering the contrasting climatic  
167 trends between the central Himalaya and Karakoram with 36 years of WRF simulations.  
168 *Climate Dynamics* **52**, 159–180 (2019). doi:<http://doi.org/10.1007/s00382-018-4133-3>.
- 169 [48] Oliphant, T. E. Python for Scientific Computing. *Computing in Science & Engineering* **9**,  
170 10–20 (2007). doi:<http://doi.org/10.1109/MCSE.2007.58>.
